# Supplementary material
Source: PubMed Central journal article supplement (PMC3887559)

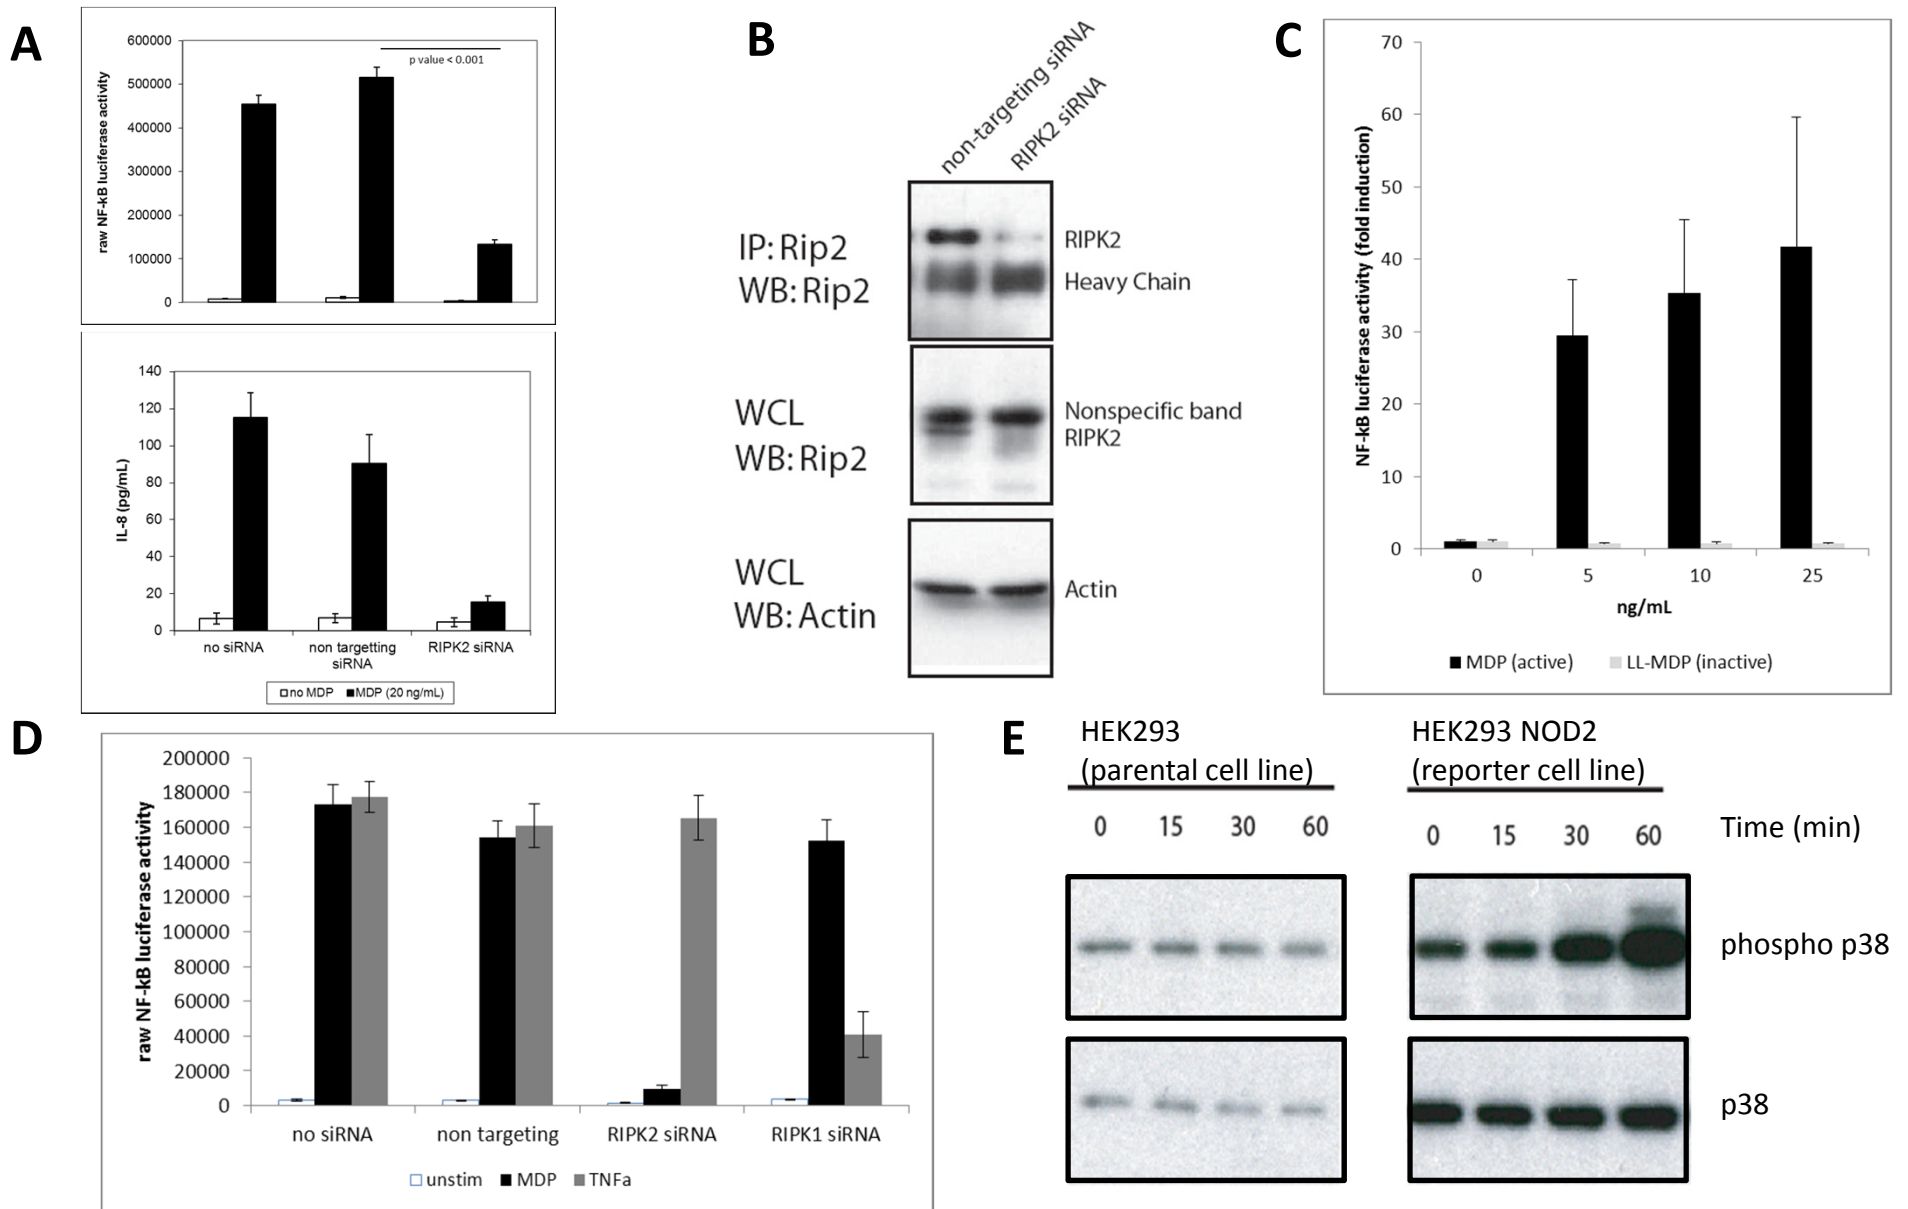

Warner et al., figure S1.



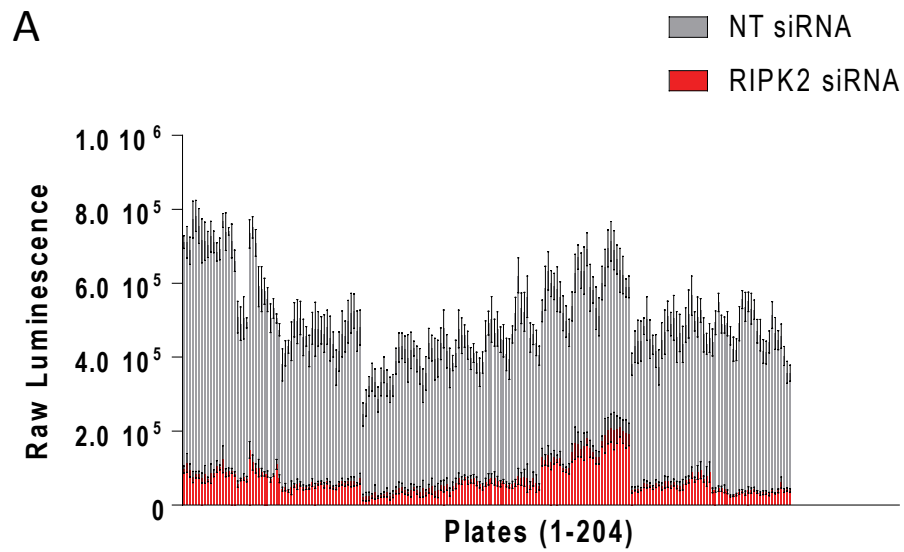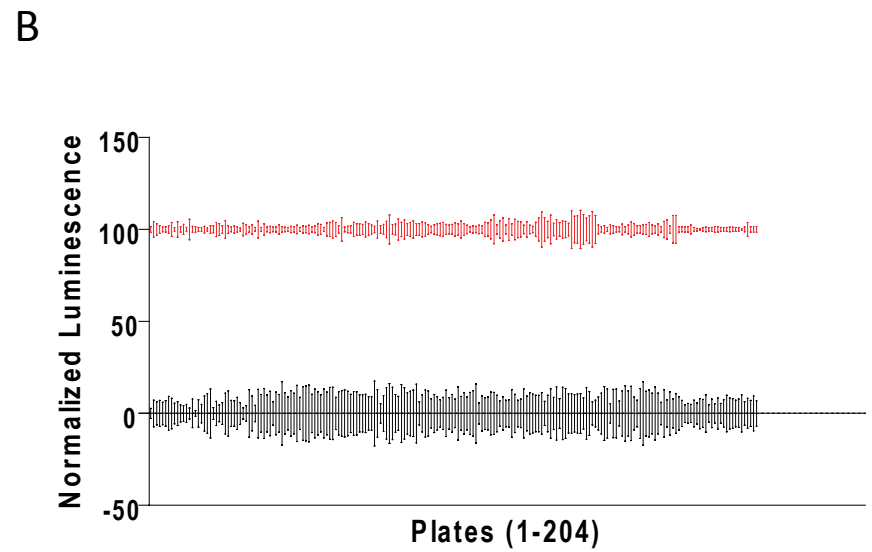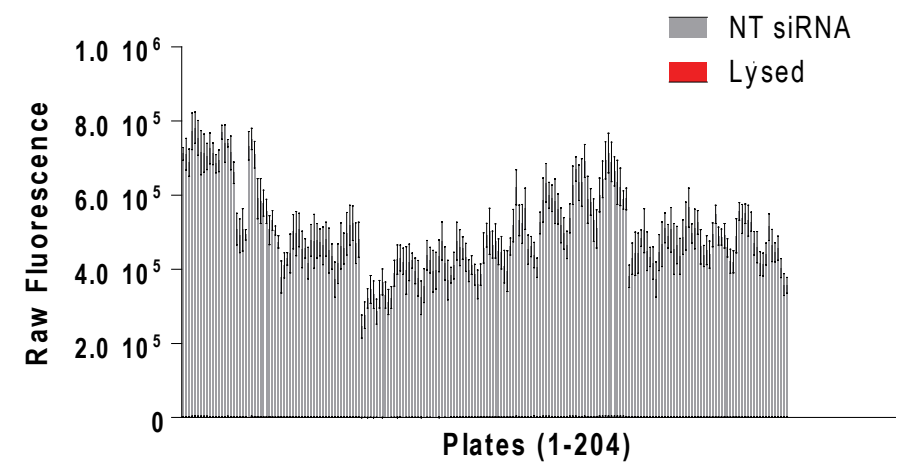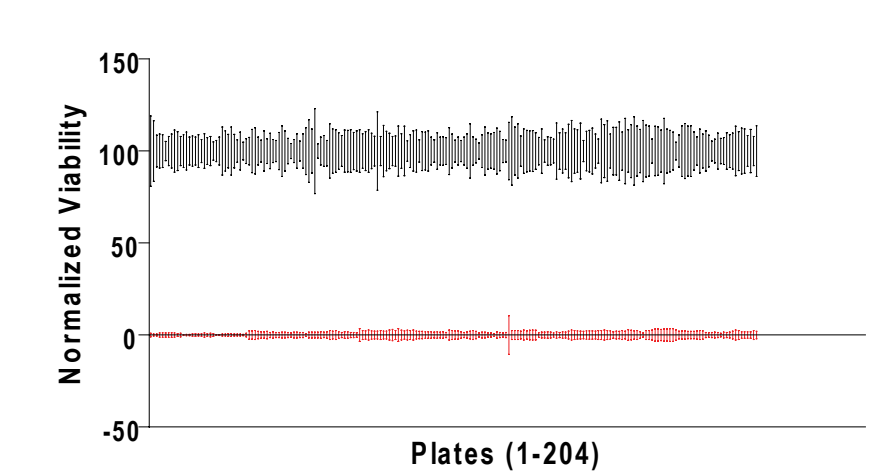

Warner et al., figure S3.

A

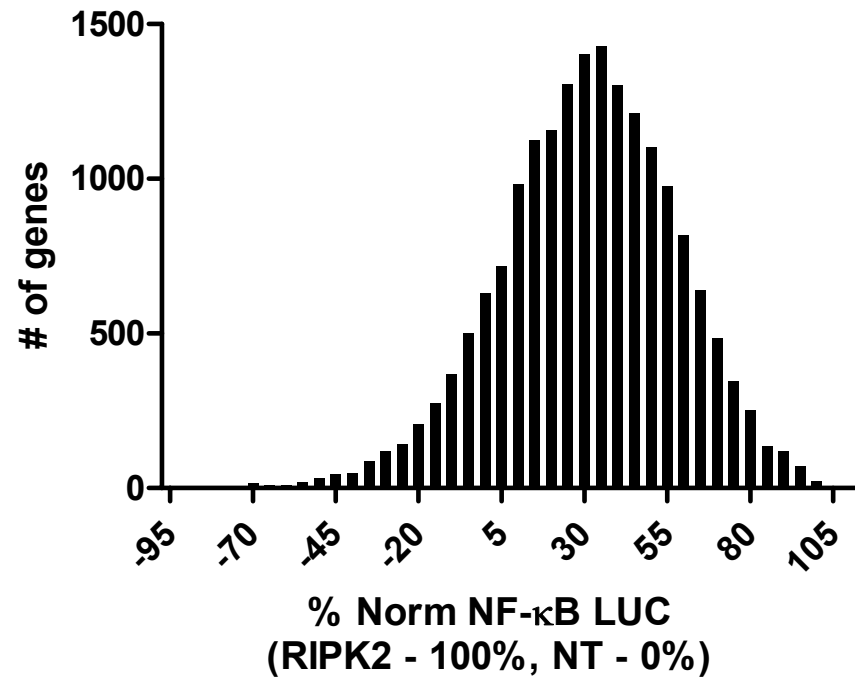

B

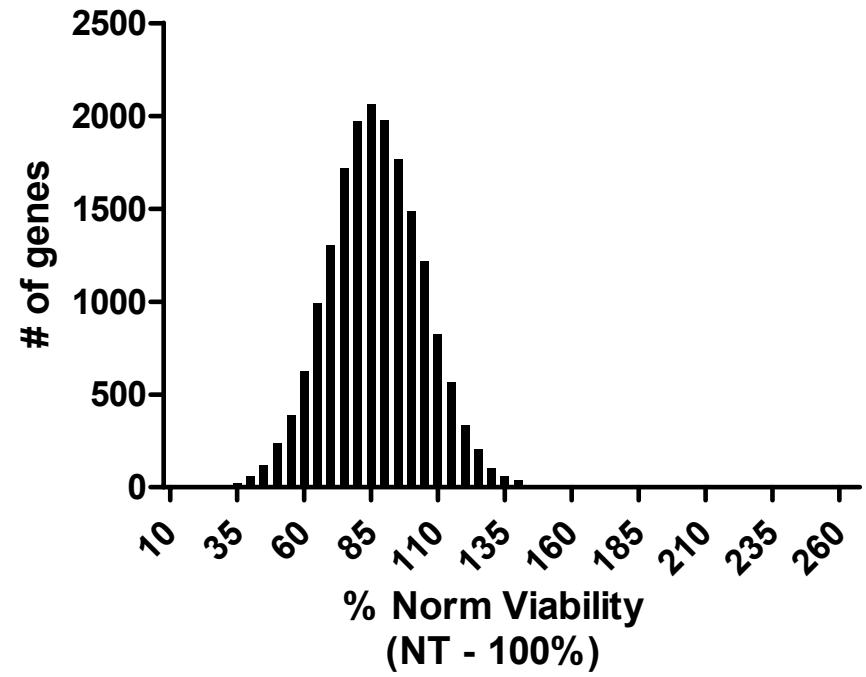

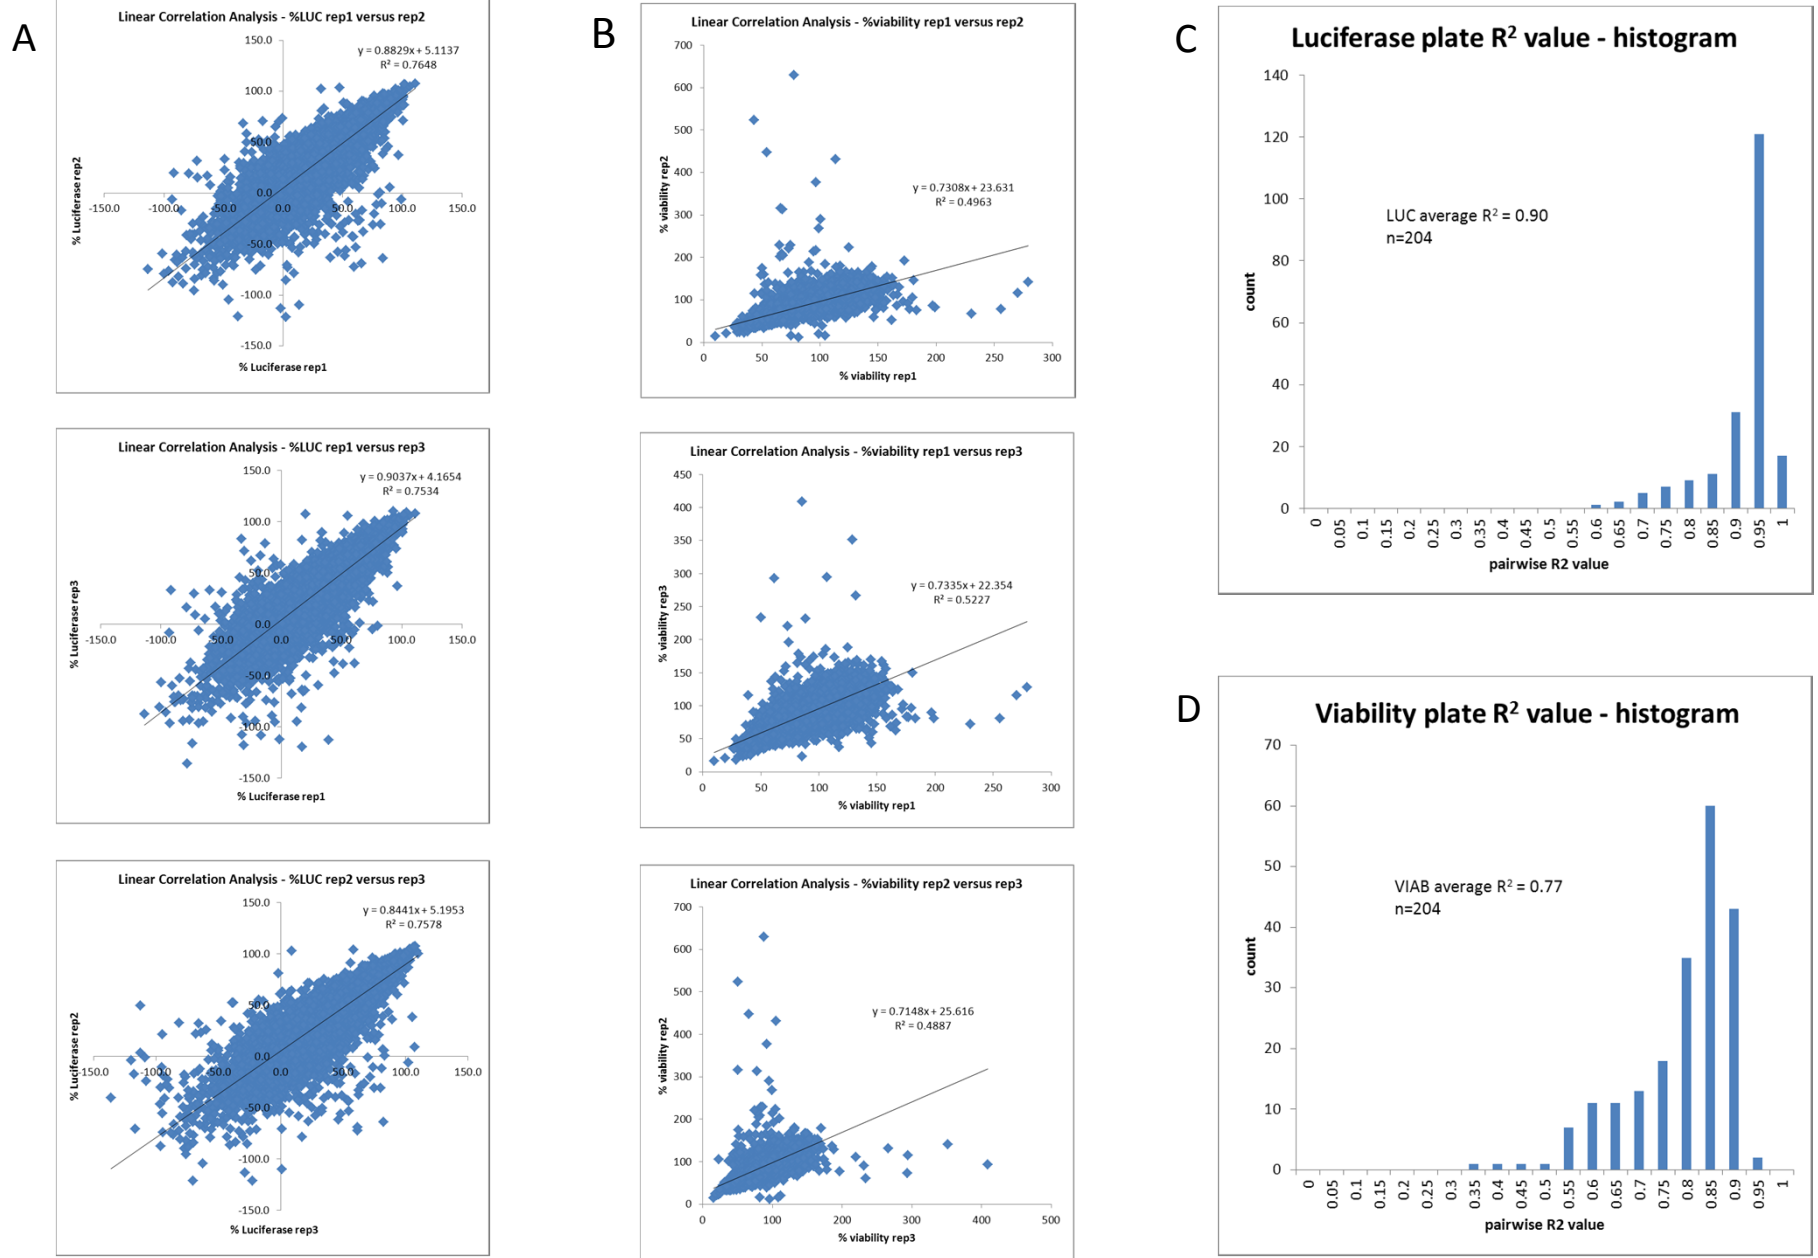

Warner et al., figure S5.

# Assay Plate Z-score Summary - Histogram

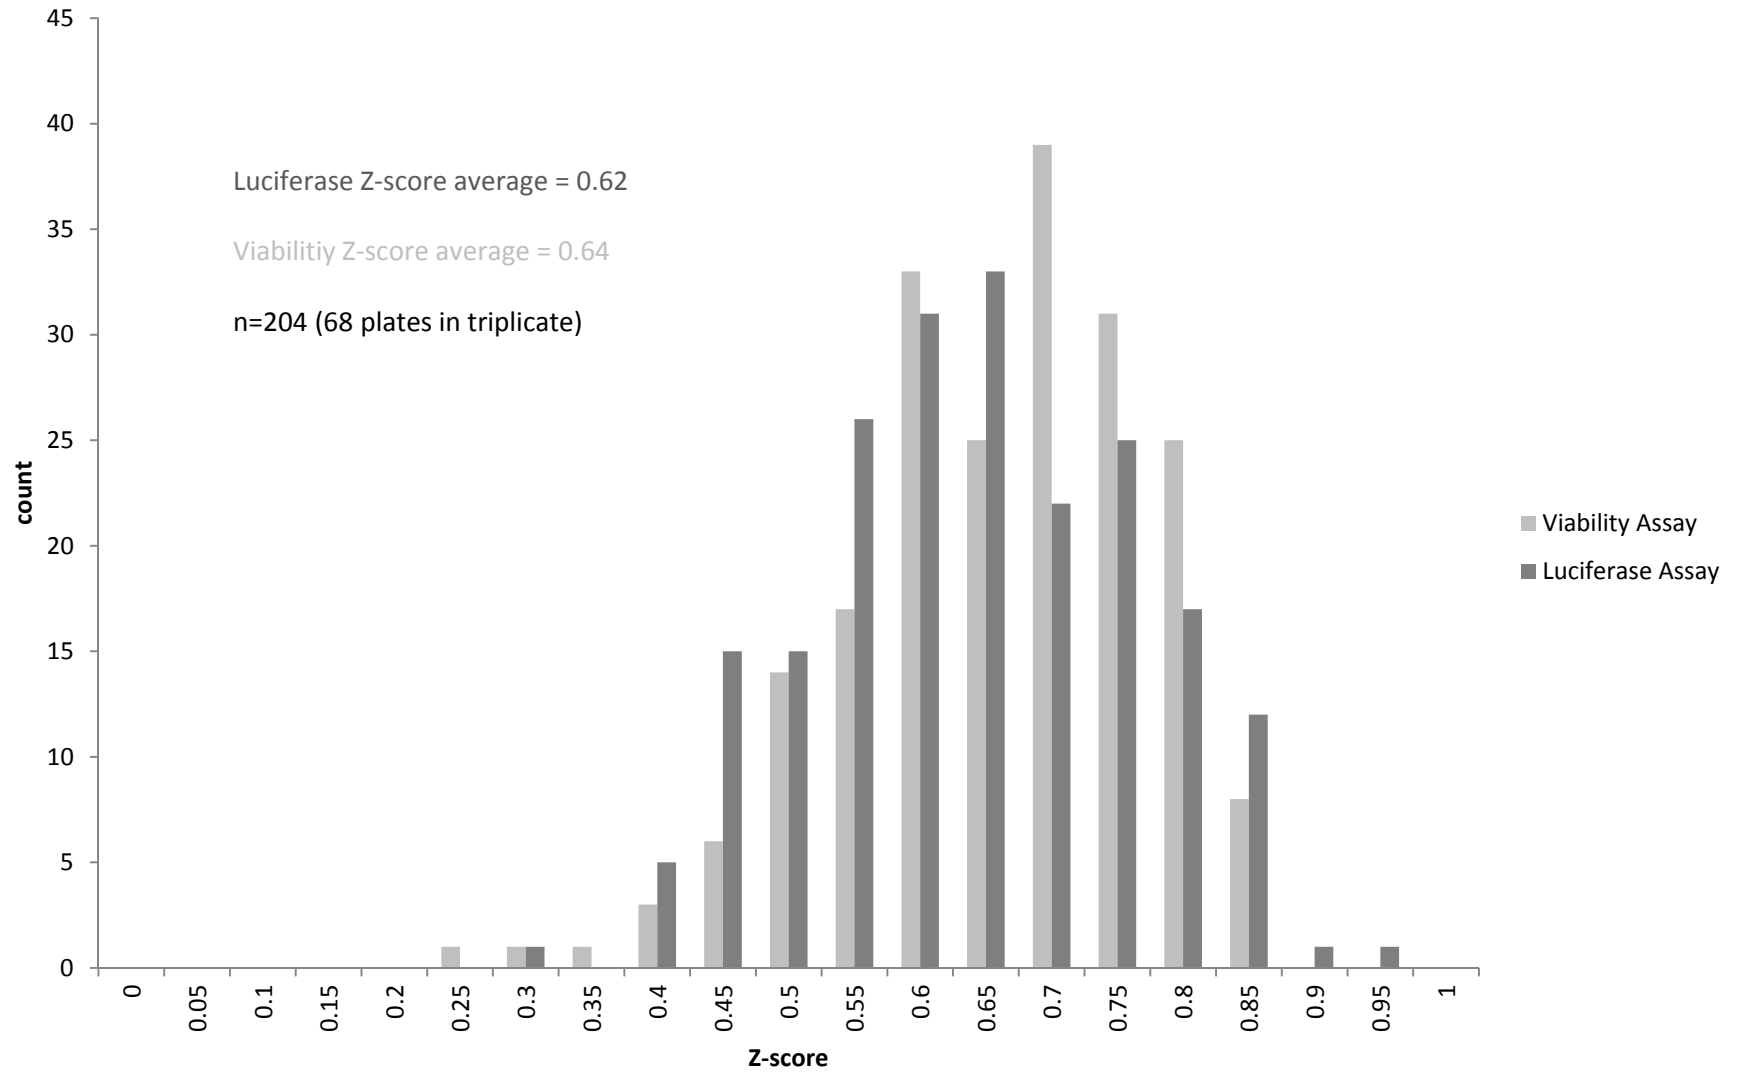

## Decreased Viability Correlates with Decreased NF-κB Luciferase Reporter Activity

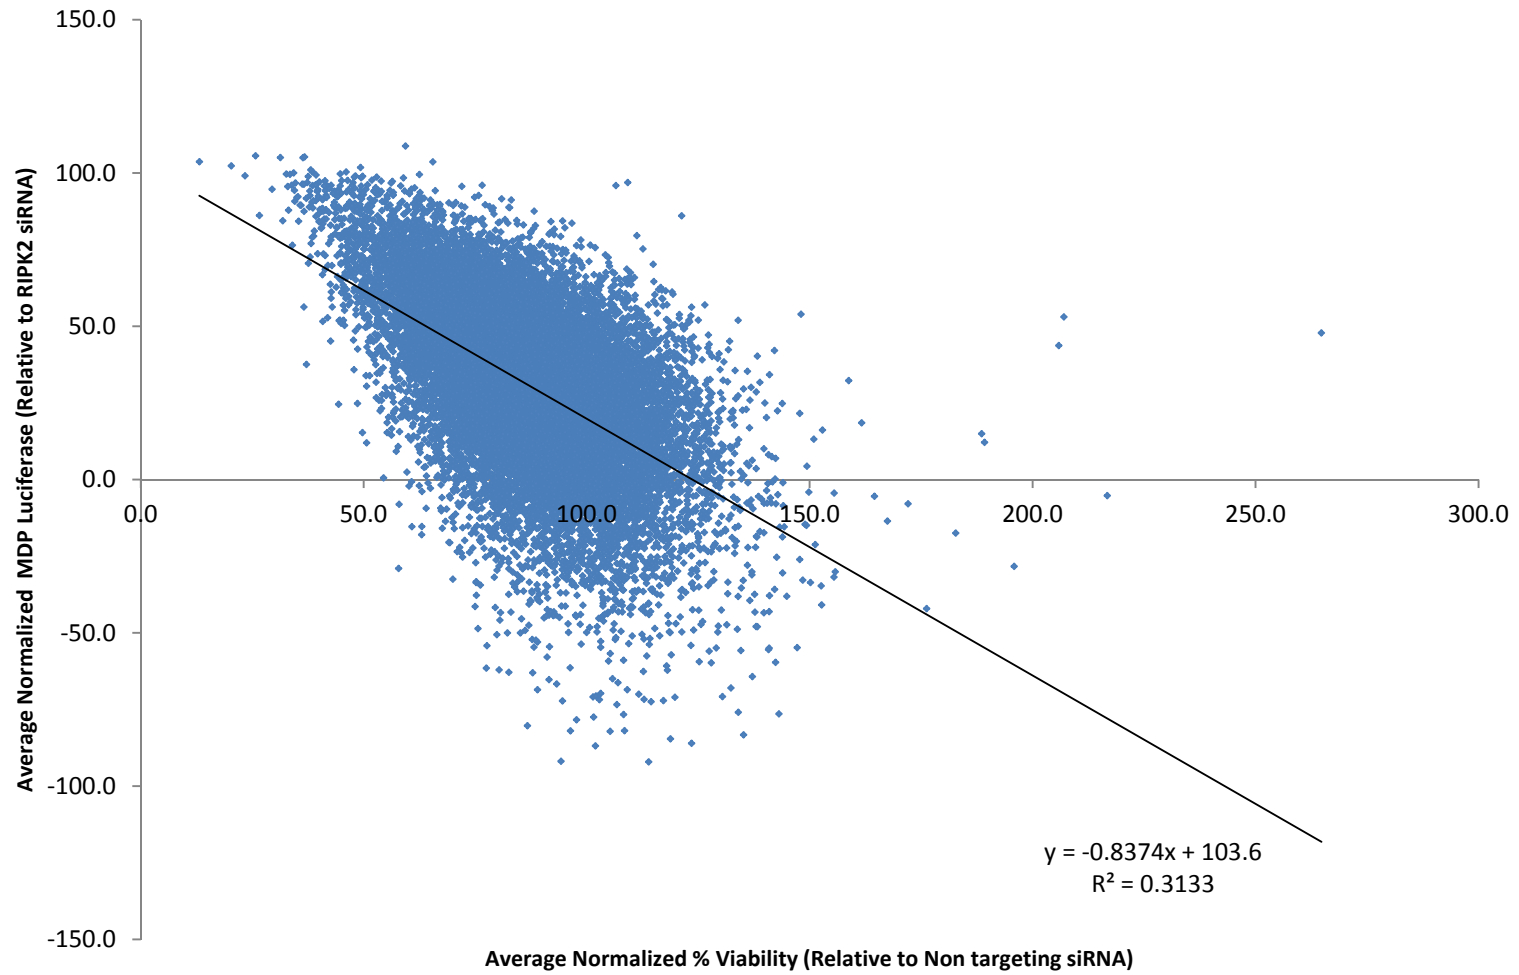

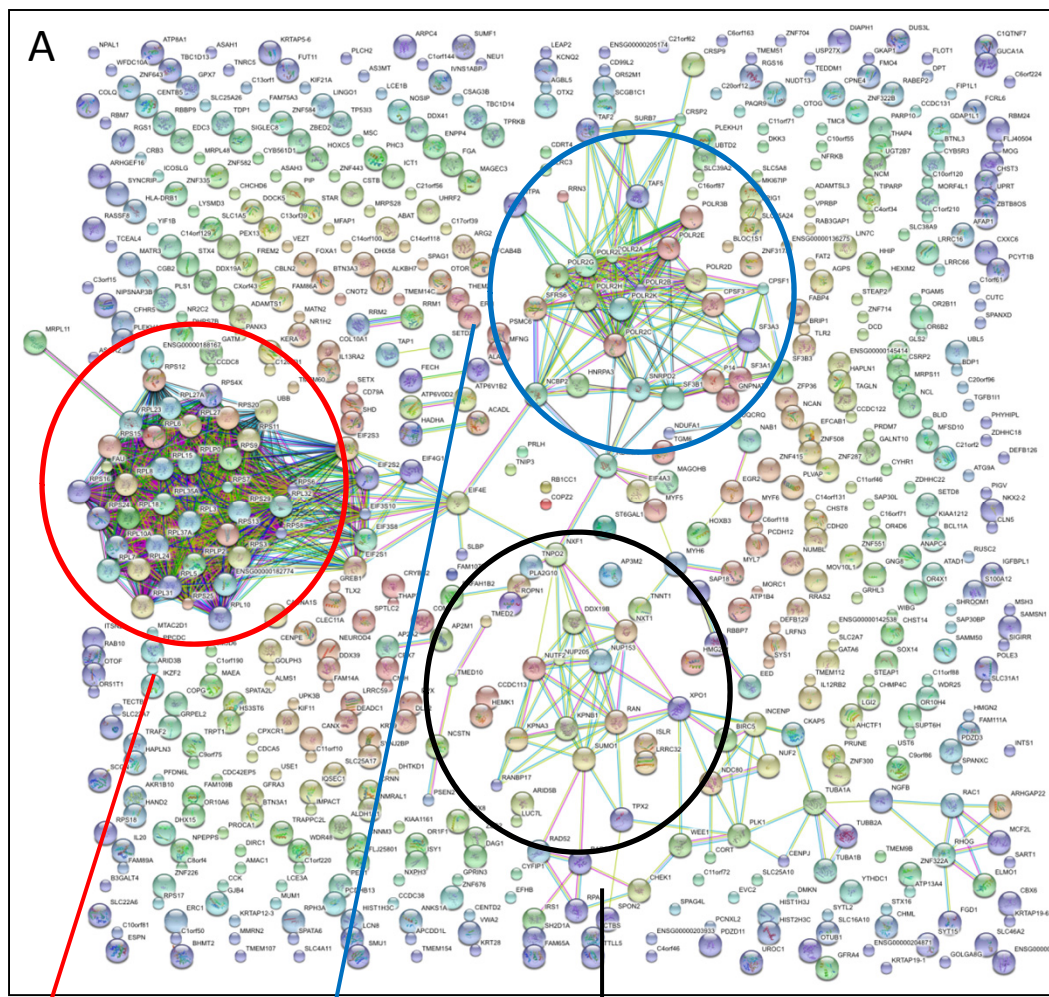

Protein Translation, Transcription, Nuclear transport

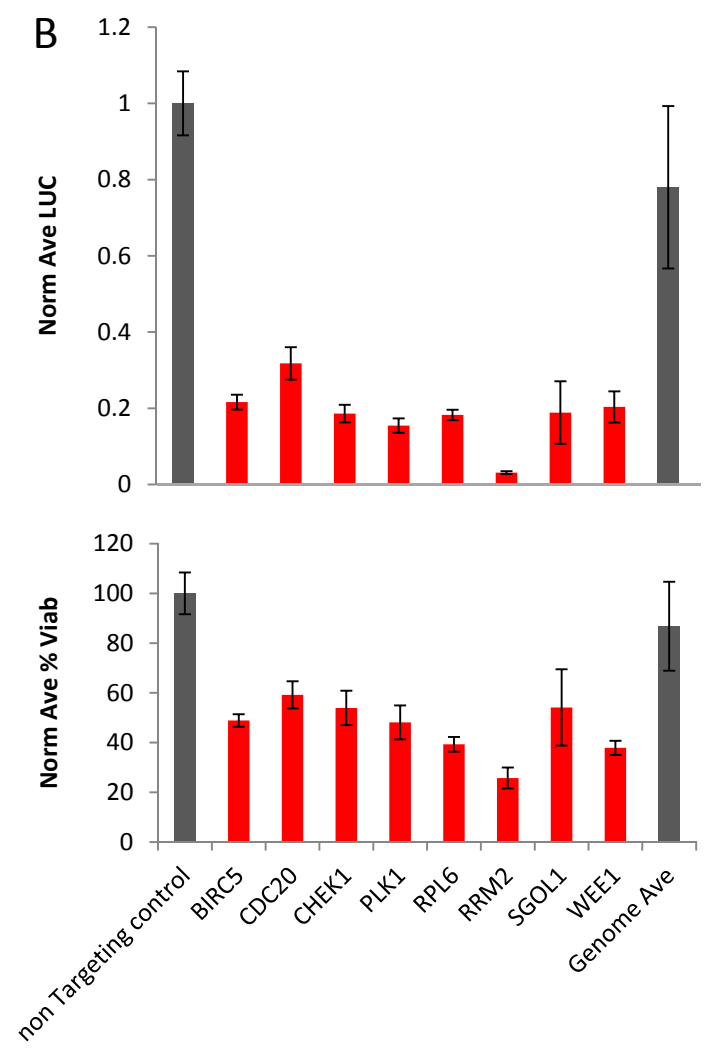

Warner et al., figure S8.





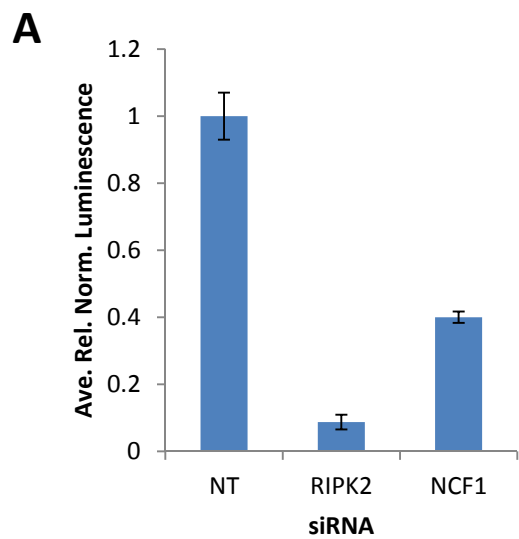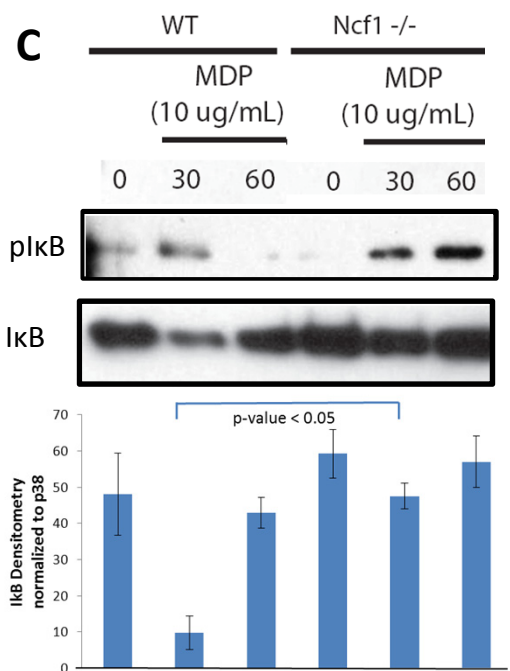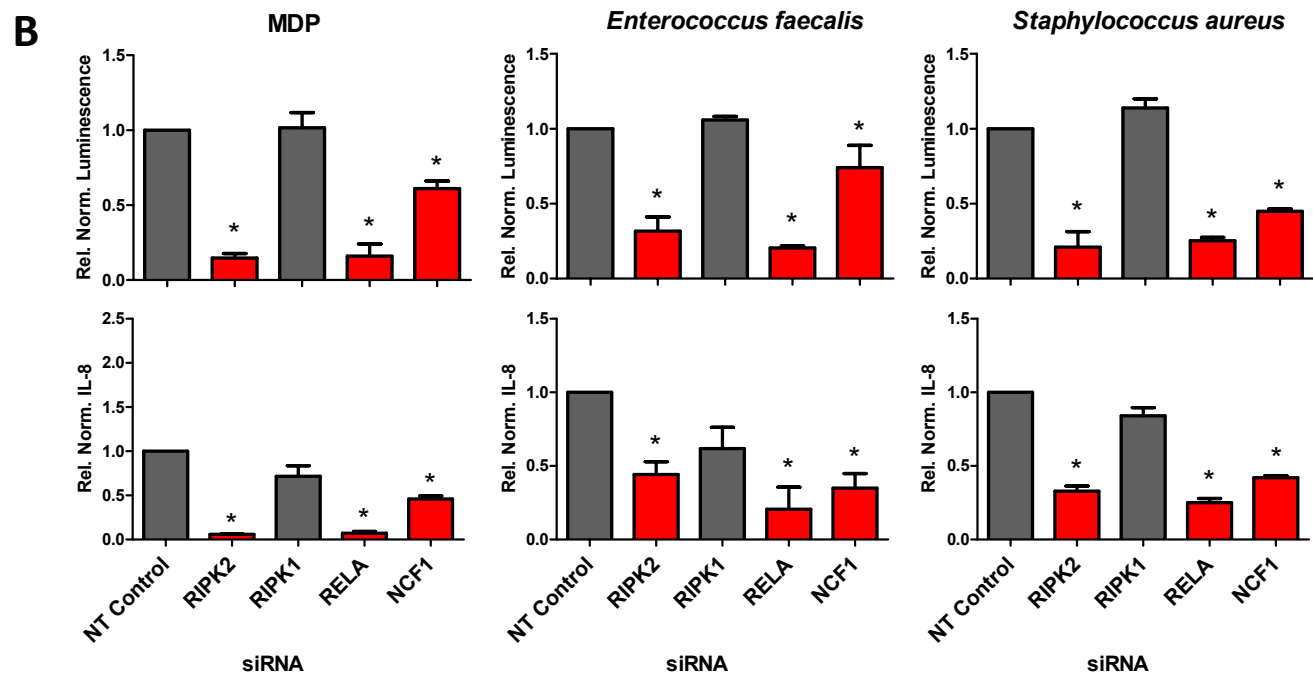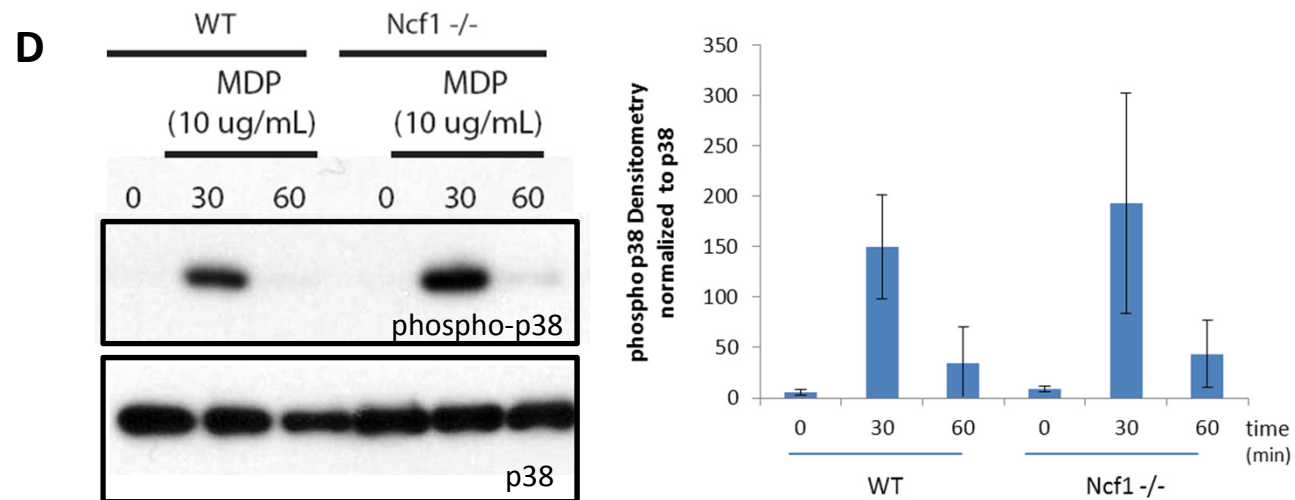

**A**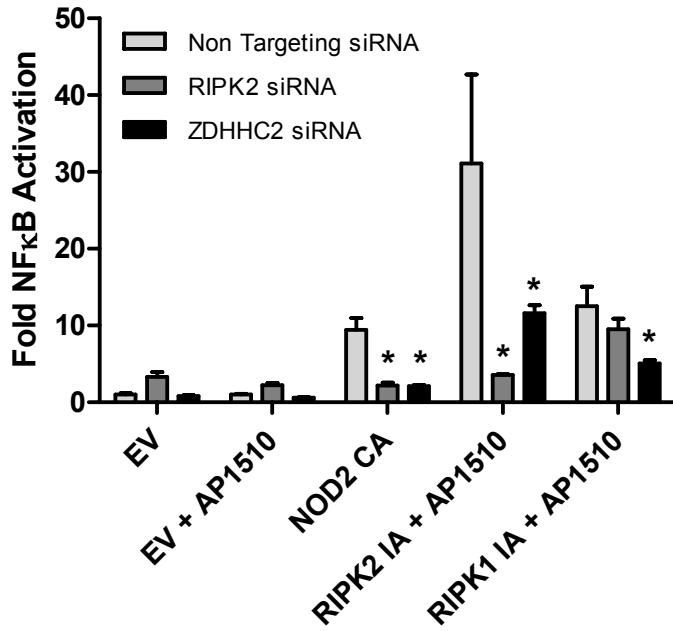**B**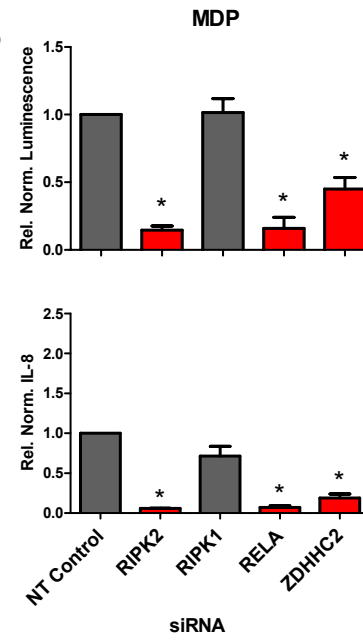**C**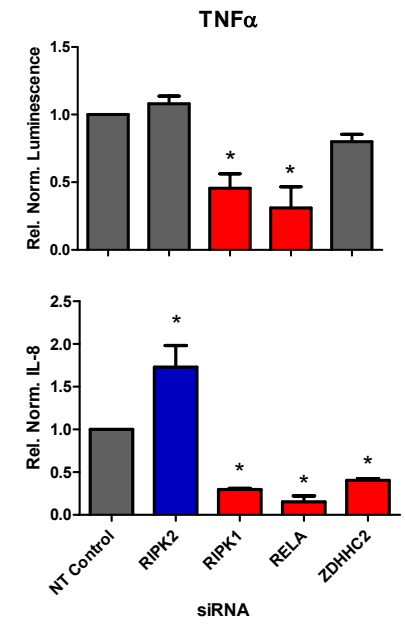**D**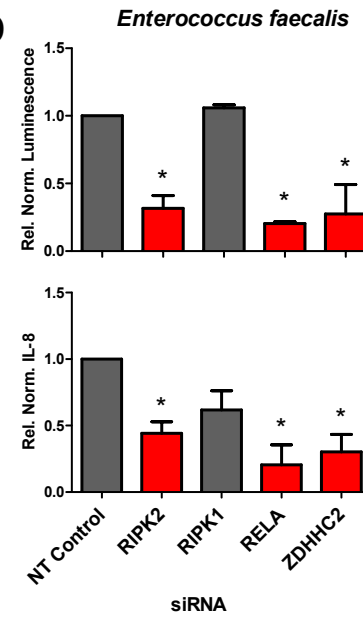**E**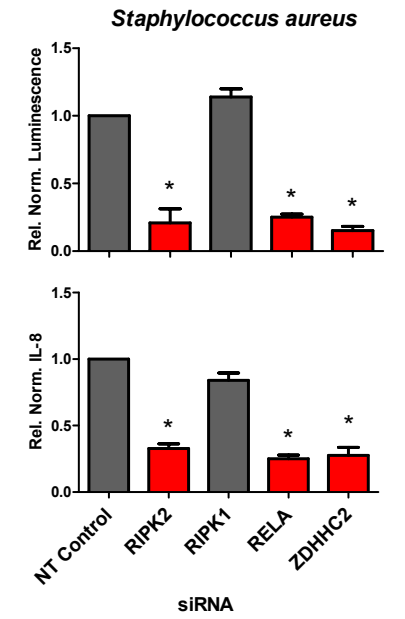

Supplement: NIHMS549635-supplement-sup_figs.pdf [file NIHMS549635-supplement-sup_figs.pdf]
